# Supplementary figures and images for: Mitochondrial Biogenesis, Telomere Length and Cellular Senescence in Parkinson’s Disease and Lewy Body Dementia
Source: Research Square preprint supplement (doi:10.21203/rs.3.rs-754233/v1), 2021-08-03

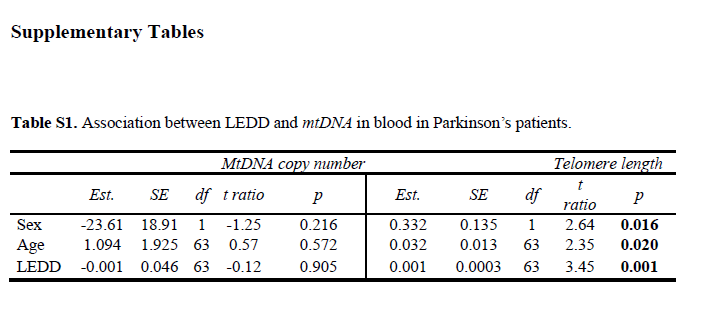


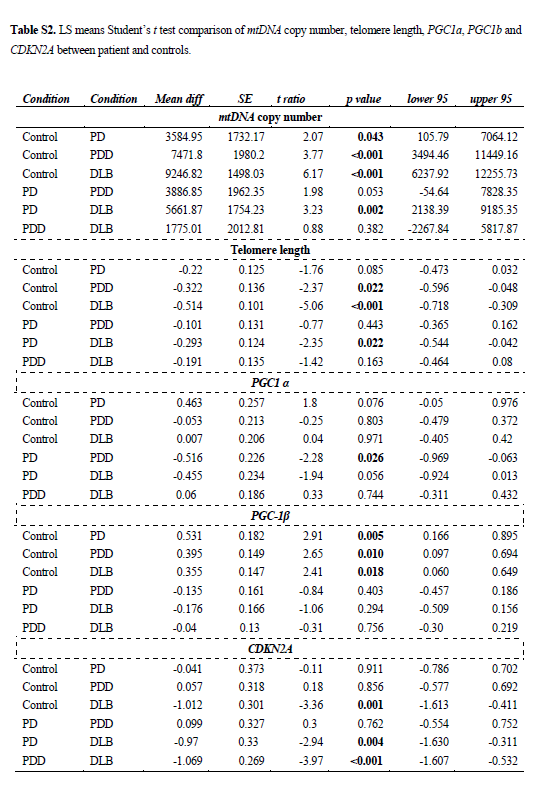

Supplement: Supplementary file 1 [file 291e60708d84de5423f01092.docx]
